# Supplementary material
Source: publisher figshare collection journal article supplement (https://tandf.figshare.com/ndownloader/files/18769244)
Supplement: Supplementary file 1 [file 18769244]

*Electronic Supplementary Material*

**A simple chemosensor for ultrasensitive fluorescent “turn-on” detection of Fe3+ and alternant detection of CN-**

Qin-Peng Zhanga, Tai-Bao Weia*, Jun-Nian Ana, Yan-Yan Chena, Guan-Fei Gonga, Qi Zhoua, Hai-Long Yanga, Hong Yaoa, You-Ming Zhanga,b and Qi Lina*

a *Key Laboratory of Eco-Environment-Related Polymer Materials, Ministry of Education of China; Research Center of Gansu Military and Civilian Integration Advanced Structural Materials; College of Chemistry and Chemical Engineering, Northwest Normal University, Lanzhou, Gansu, 730070, China.*

*b College of Chemistry and Chemical Engineering, Lanzhou City University, Lanzhou, Gansu, 730070, P. R. China.*

Contens

[**Figure S1.** The 1H NMR spectra of chemosensor **T** in CDCl3. 3](#_Toc21715806)

[**Figure S2.** The 13C NMR spectra of chemosensor **T** in CDCl3 (150 MHz, 298K). 3](#_Toc21715807)

[**Figure S3.** ESI-MS spectra of chemosensor **T**. 4](#_Toc21715808)

[**Figure S4.** (a) Fluorescent spectra and (b) Fluorescent histogram of the **T** (2 × 10-4 M, *λ*ex = 390 nm, *λ*em = 528 nm) in DMSO/H2O binary solution with different volumetric fractions of water (vol%). 4](#_Toc21715809)

[**Figure S5.** The photograph of the UV-vis absorption spectra linear range: chemosensor **T** for Fe3+. 4](#_Toc21715810)

[**Figure S6.** The photograph of the fluorescent spectra linear range:chemosensor **T** for Fe3+. 5](#_Toc21715811)

[**Figure S7.** UV-vis absorption spectra of chemosensor **T-Fe3+** (2 × 10-4 M) in DMSO/H2O (8 : 2, v/v) binary solution in the presence of CN- and other anions ( 5.0 equiv.). 5](#_Toc21715812)

[**Figure S8.** UV-vis absorption histogram of **T-Fe3+** with addition of 5.0 equiv. CN- in the presence of various anions in DMSO/H2O (8 : 2, v/v) binary solution (*λ*ex = 285 nm). 6](#_Toc21715813)

[**Figure S9.** The photograph of (a) UV-vis titration spectra of chemosensor **T-Fe3+** with increasing concentrations of CN-; (b) the UV-vis absorption spectra linear range: the complex **T-Fe3+** for CN-. 6](#_Toc21715814)

[**Figure S10.** The photograph of (a) fluorescent titration spectra of chemosensor **T-Fe3+** with increasing concentrations of CN- (*λ*ex = 390 nm); (b) fluorescent spectra linear range: the complex **T-Fe3+** for CN-. 6](#_Toc21715815)

[**Figure S11.** FT-IR spectra of powder **T**, **T-Fe3+** and **T-Fe3+**-**CN-**. 7](#_Toc21715816)

[**Figure S12.** The Job’s plot of chemosensor **T** with Fe3+, indicating the 2 : 1 stoichiometry between **T** and Fe3+ (*λ*ex = 390 nm, *λ*em = 528 nm). 7](#_Toc21715817)

[**Figure S13.** The Mass spectroscopy of **T-Fe3+**. 8](#_Toc21715818)

[**Figure S14.** The SEM images of powder (a) **T**, (b) **T-Fe3+** and(c) **T-Fe3+**-**CN-**. 8](#_Toc21715819)

[**Figure S15.** Energy-minimized structure of chemosensor **T** and **T-Fe3+**. 8](#_Toc21715820)

[**Figure S16.** Fluorescent ‘‘on-off-on’’ cycles of **T-Fe3+**, controlled by alternating the addition of Fe3+ and CN- (*λ*ex = 390 nm, *λ*em = 528 nm). 9](#_Toc21715821)

[**Figure S17.** Fluorescence emission spectra of **T** (2 × 10-4 M) in the presence of Fe3+ (0.24 equiv.) and CN- (9.8 equiv.) in DMSO/H2O (8 : 2, v/v) binary solution (*λ*ex = 390 nm). Inset: photograph from left to right shows the change in the fluorescence of only **T**, **T-Fe3+** and **T-Fe3+-CN-** in DMSO/H2O (8 : 2, v/v) binary solution under irradiation at UV lamp (365 nm). 9](#_Toc21715822)


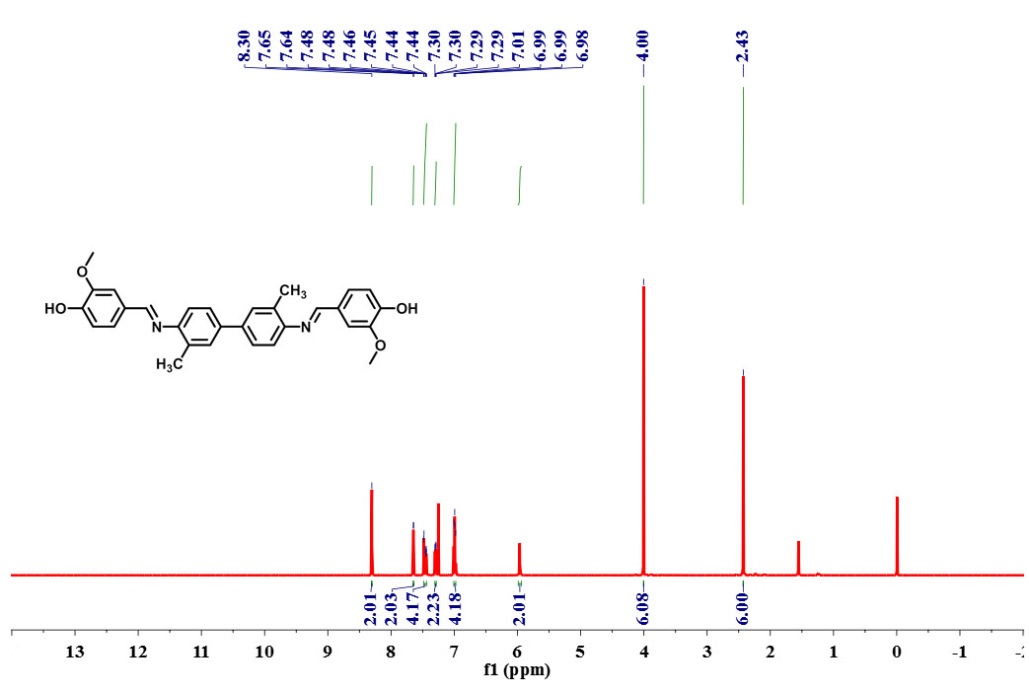


**Figure S1.** The 1H NMR spectra of chemosensor **T** in CDCl3.


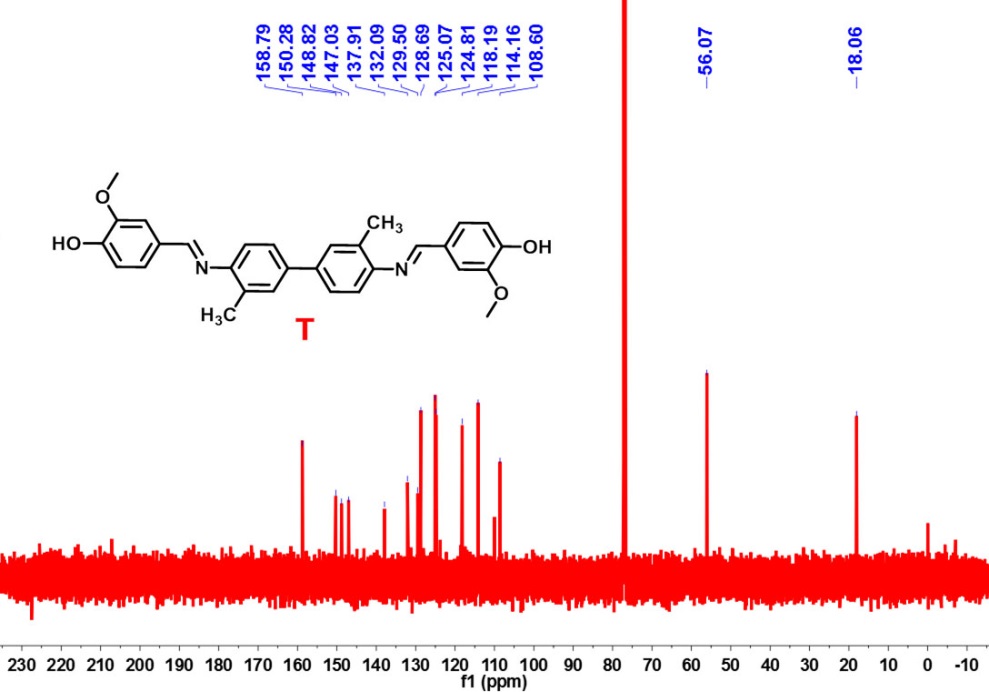


**Figure S2.** The 13C NMR spectra of chemosensor **T** in CDCl3 (150 MHz, 298K).


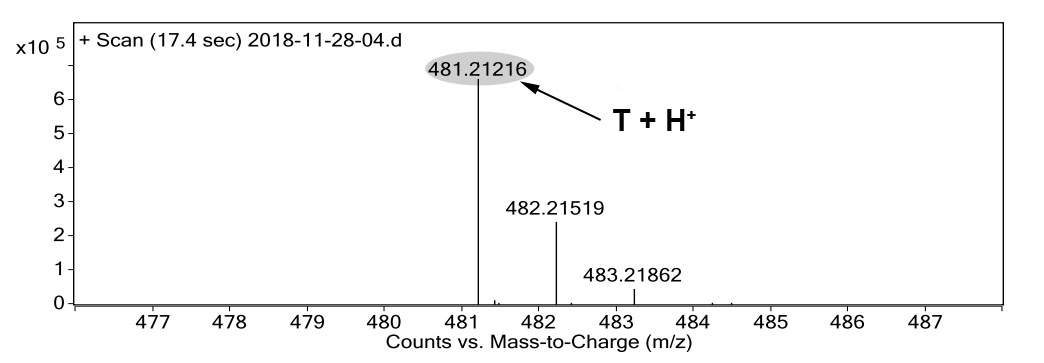


**Figure S3.** ESI-MS spectra of chemosensor **T**.


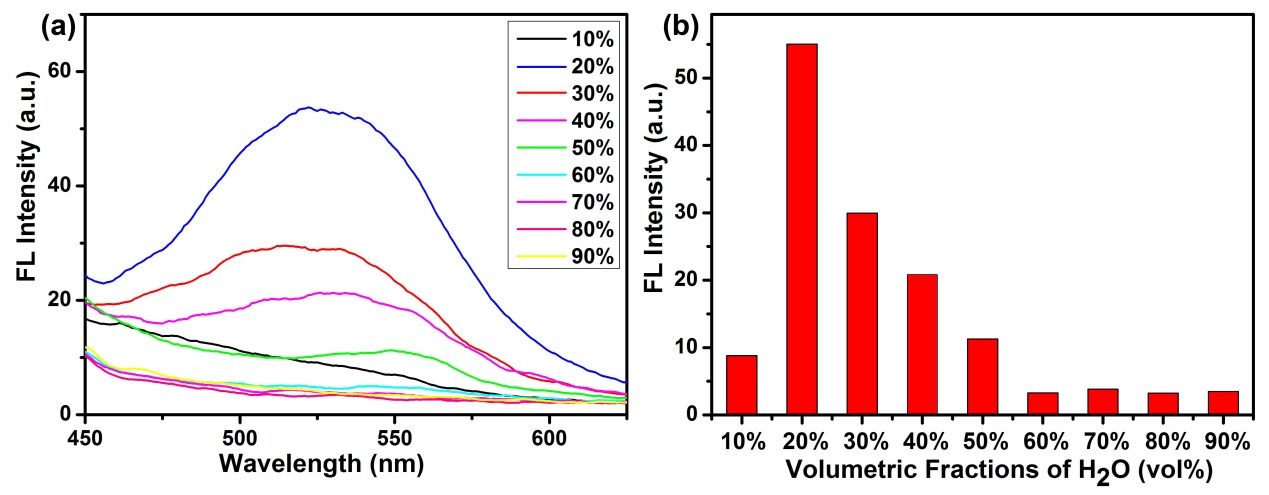


**Figure S4.** (a) Fluorescent spectra and (b) Fluorescent histogram of the **T** (2 × 10-4 M, *λ*ex = 390 nm, *λ*em = 528 nm) in DMSO/H2O binary solution with different volumetric fractions of water (vol%).


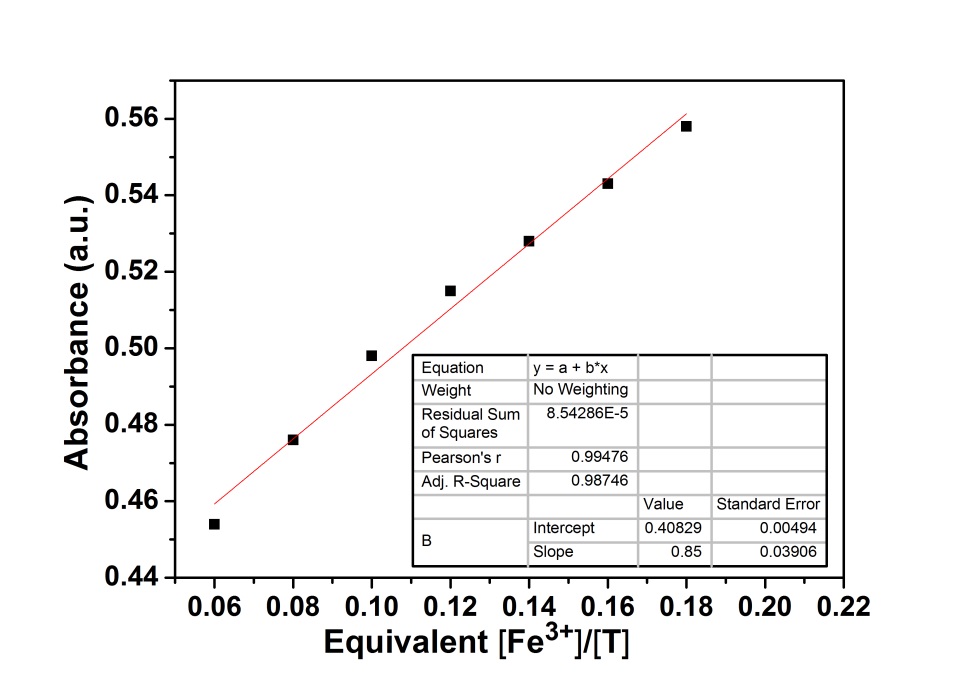


**Figure S5.** The photograph of the UV-vis absorption spectra linear range: chemosensor **T** for Fe3+.


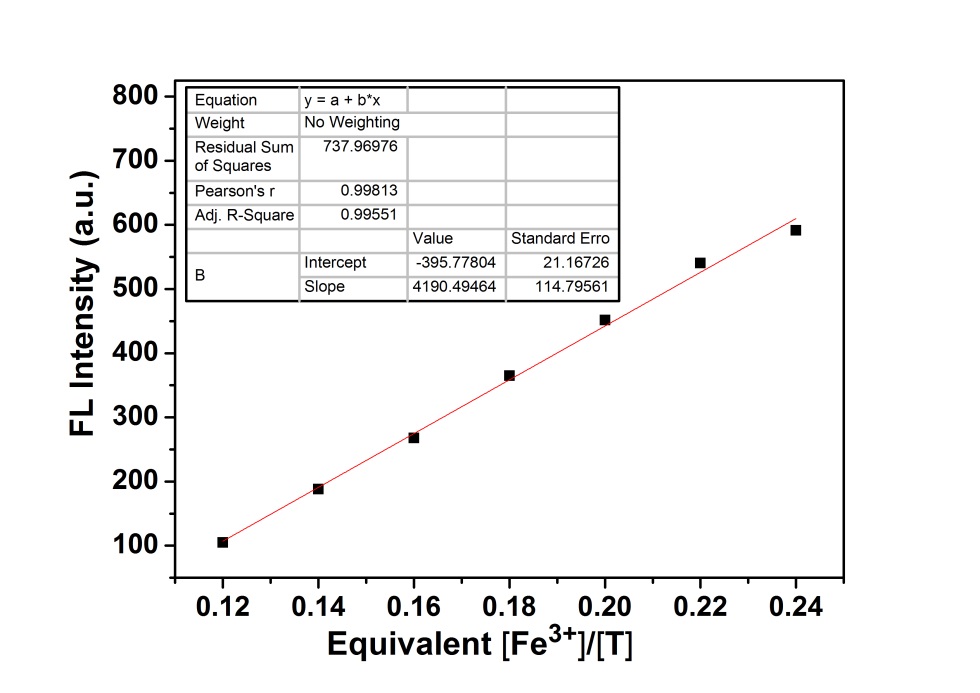


**Figure S6.** The photograph of the fluorescent spectra linear range:chemosensor **T** for Fe3+.


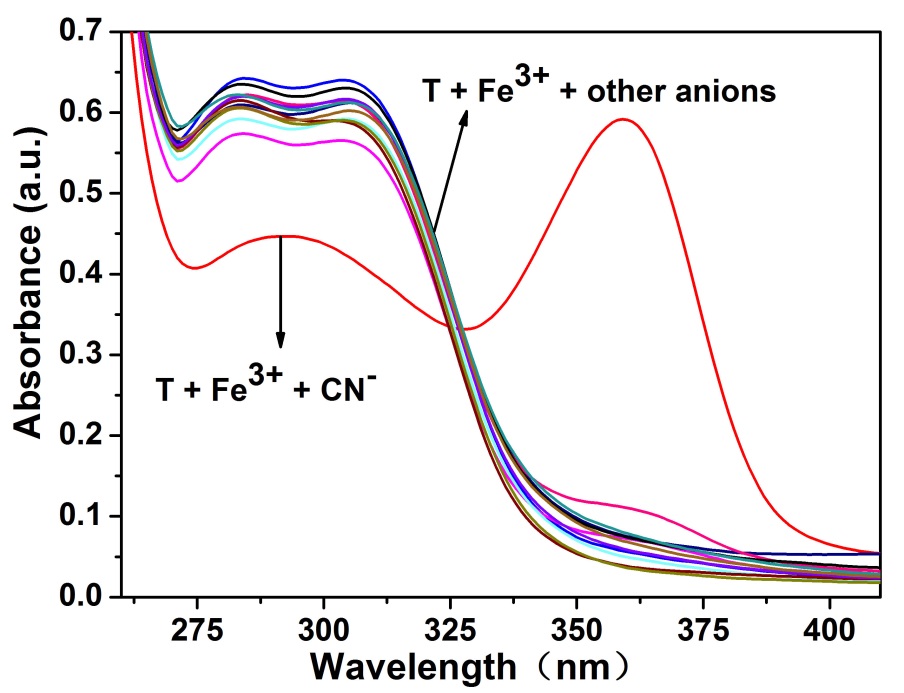


**Figure S7.** UV-vis absorption spectra of chemosensor **T-Fe3+** (2 × 10-4 M) in DMSO/H2O (8 : 2, v/v) binary solution in the presence of CN- and other anions ( 5.0 equiv.).


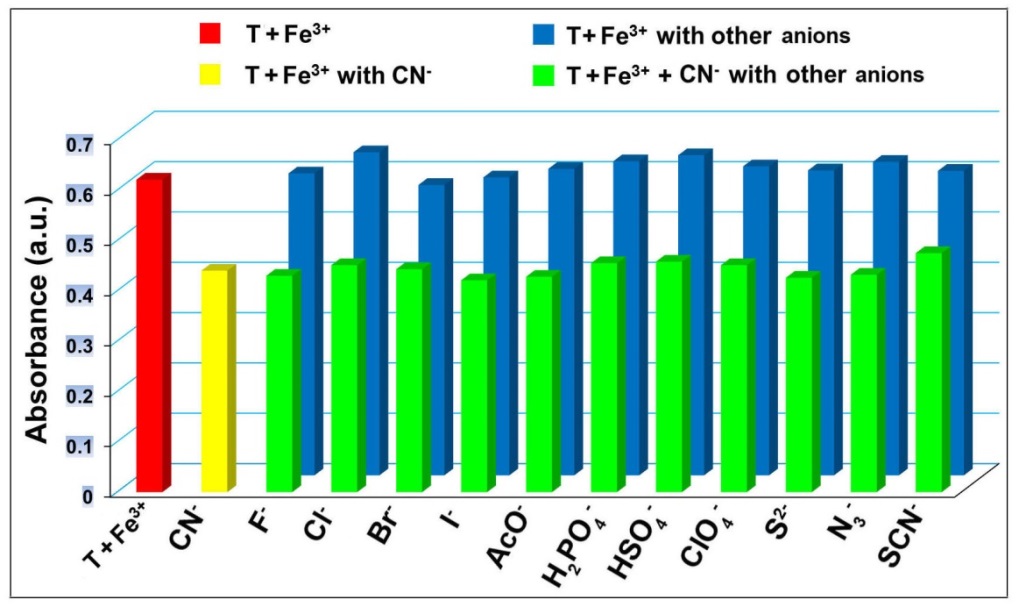


**Figure S8.** UV-vis absorption histogram of **T-Fe3+** with addition of 5.0 equiv. CN- in the presence of various anions in DMSO/H2O (8 : 2, v/v) binary solution (*λ*ex = 285 nm).


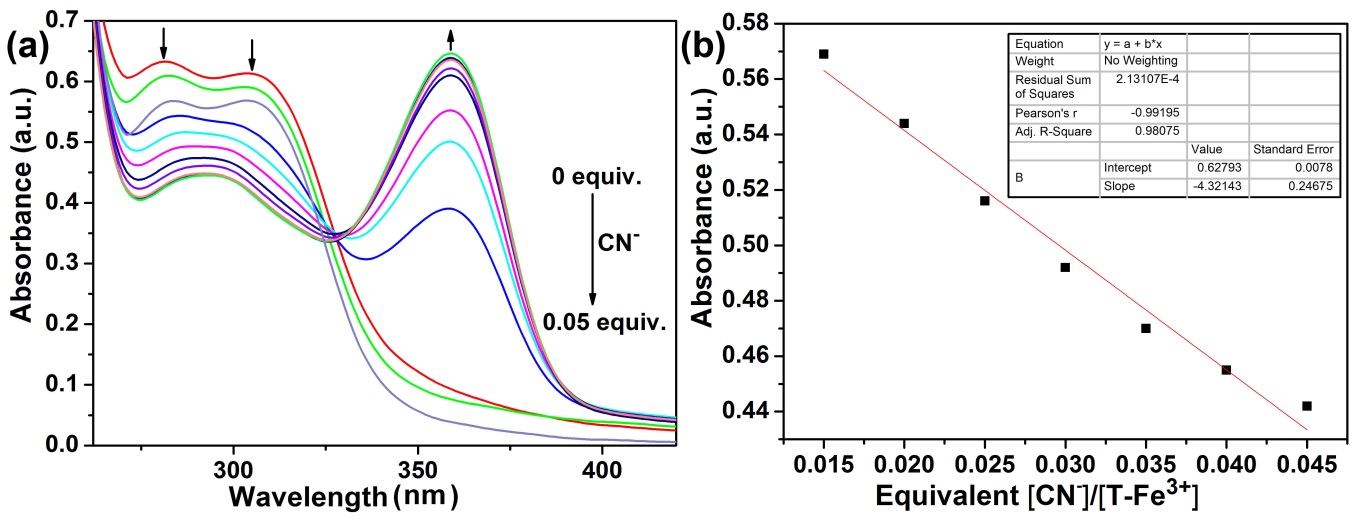


**Figure S9.** The photograph of (a) UV-vis titration spectra of chemosensor **T-Fe3+** with increasing concentrations of CN-; (b) the UV-vis absorption spectra linear range: the complex **T-Fe3+** for CN-.


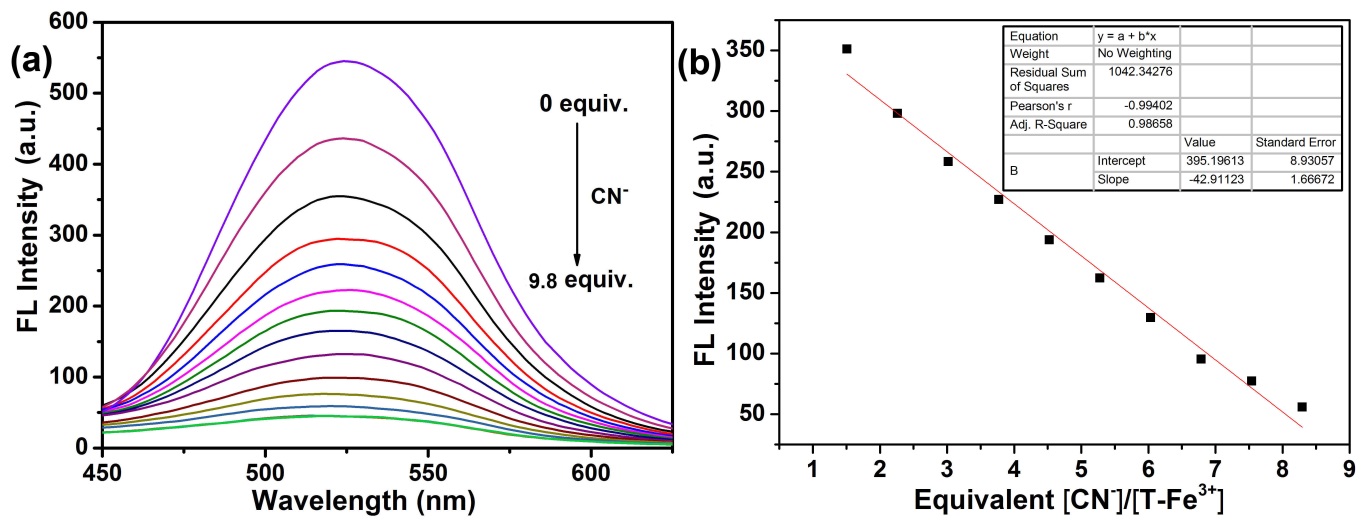


**Figure S10.** The photograph of (a) fluorescent titration spectra of chemosensor **T-Fe3+** with increasing concentrations of CN- (*λ*ex = 390 nm); (b) fluorescent spectra linear range: the complex **T-Fe3+** for CN-.


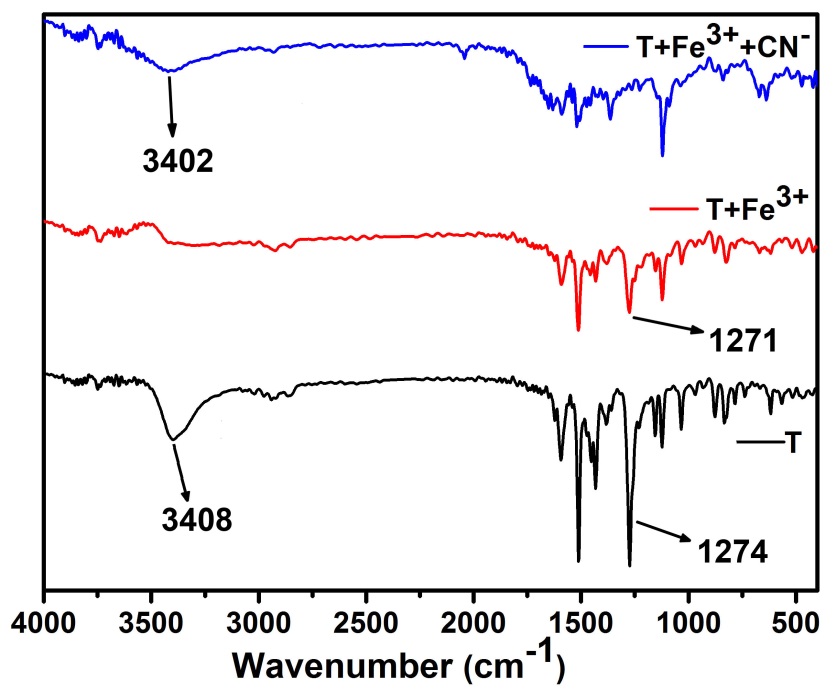


**Figure S11.** FT-IR spectra of powder **T**, **T-Fe3+** and **T-Fe3+**-**CN-**.


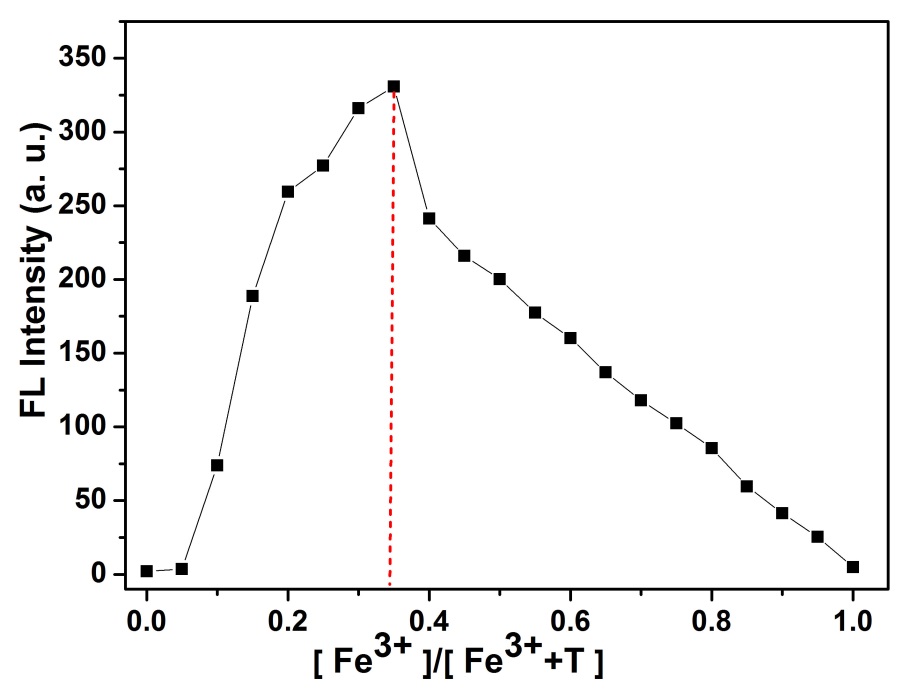


**Figure S12.** The Job’s plot of chemosensor **T** with Fe3+, indicating the 2 : 1 stoichiometry between **T** and Fe3+ (*λ*ex = 390 nm, *λ*em = 528 nm).


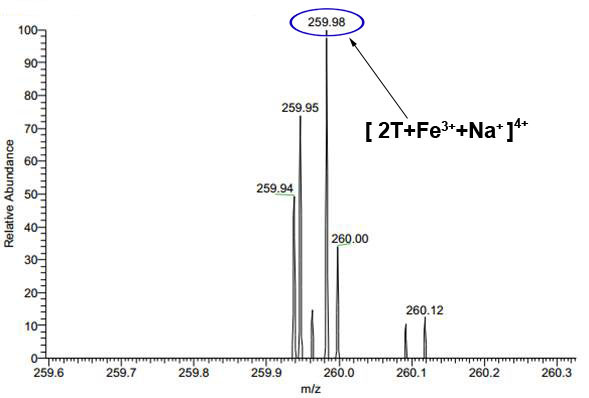


**Figure S13.** The Mass spectroscopy of **T-Fe3+**.


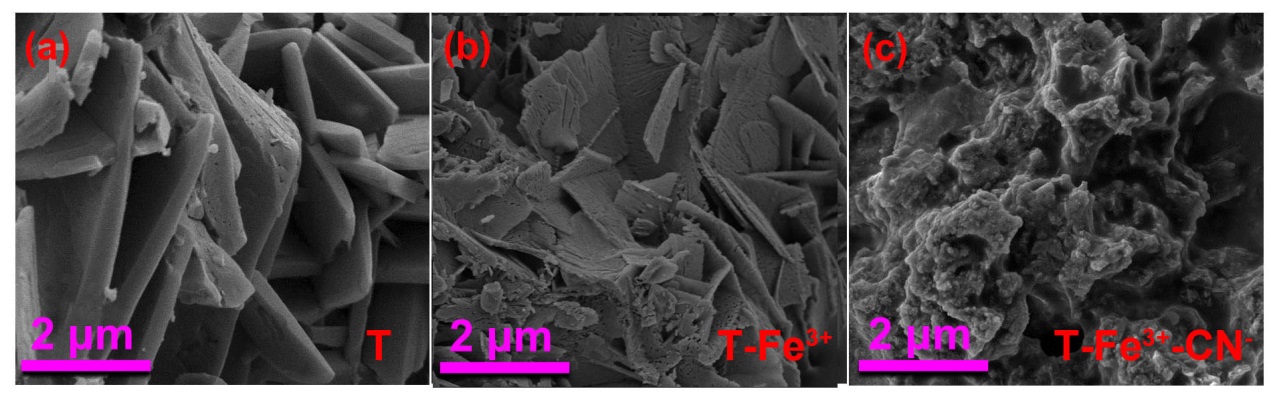


**Figure S14.** The SEM images of powder (a) **T**, (b) **T-Fe3+** and(c) **T-Fe3+**-**CN-**.


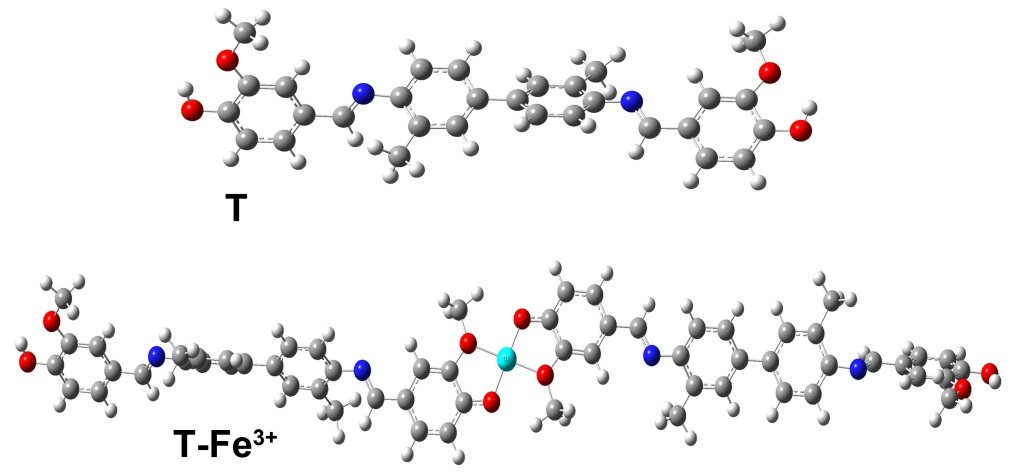


**Figure S15.** Energy-minimized structure of chemosensor **T** and **T-Fe3+**.


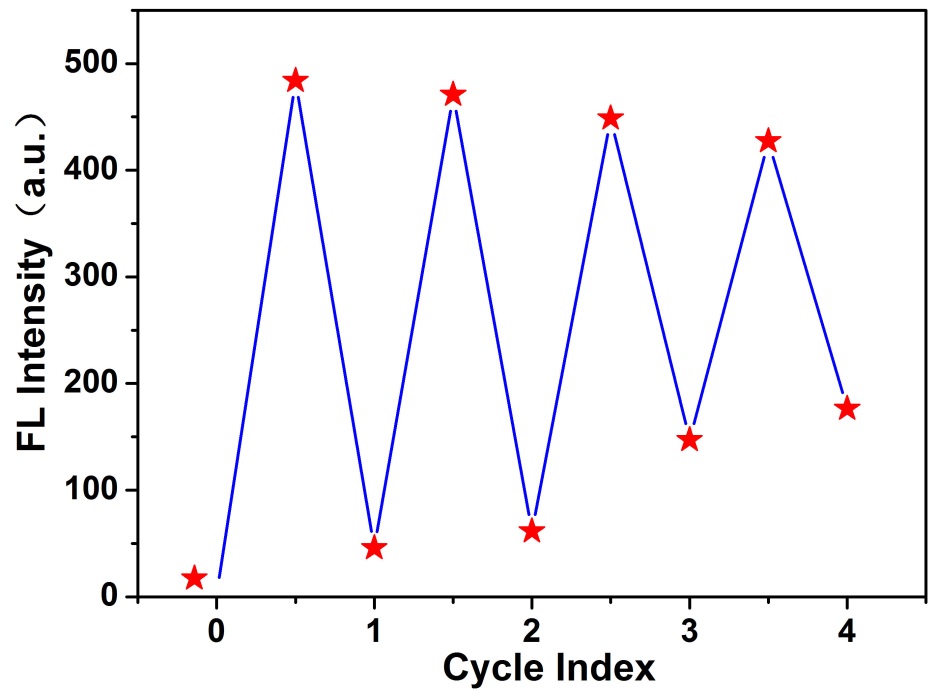


**Figure S16.** Fluorescent ‘‘on-off-on’’ cycles of **T-Fe3+**, controlled by alternating the addition of Fe3+ and CN- (*λ*ex = 390 nm, *λ*em = 528 nm).


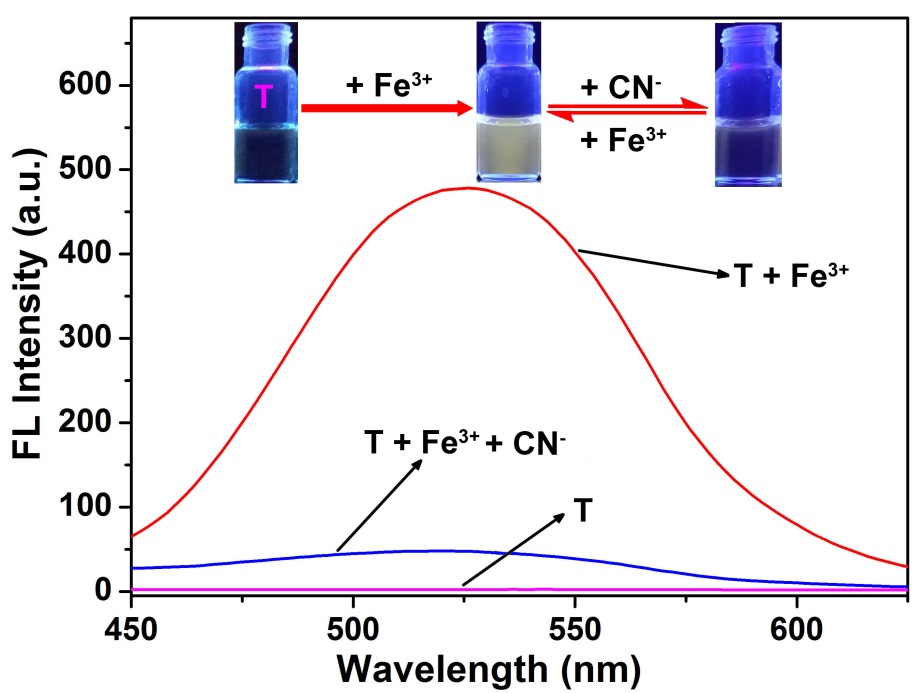


**Figure S17.** Fluorescence emission spectra of **T** (2 × 10-4 M) in the presence of Fe3+ (0.24 equiv.) and CN- (9.8 equiv.) in DMSO/H2O (8 : 2, v/v) binary solution (*λ*ex = 390 nm). Inset: photograph from left to right shows the change in the fluorescence of only **T**, **T-Fe3+** and **T-Fe3+-CN-** in DMSO/H2O (8 : 2, v/v) binary solution under irradiation at UV lamp (365 nm).
